# Supplementary material for: Aβ and tau prions feature in the neuropathogenesis of Down syndrome
Source: PubMed Central journal article supplement (PMC9674250; doi:10.1073/pnas.2212954119), 2022-11-07
Supplement: pnas.2212954119.sapp.pdf [file pnas.2212954119.sapp.pdf]

## **Supporting Information for** A $\beta$ and tau prions feature in the neuropathogenesis of Down syndrome

Carlo Condello<sup>1,2\*</sup>, Alison M. Maxwell<sup>3</sup>, Erika Castillo<sup>1</sup>, Atsushi Aoyagi<sup>1,4</sup>, Caroline Graff<sup>5,6</sup>, Martin Ingelsson<sup>7,8,9</sup>, Lars Lannfelt<sup>7</sup>, Thomas D. Bird<sup>10,11</sup>, C. Dirk Keene<sup>12</sup>, William W. Seeley<sup>2,13</sup>, Daniel P. Perl<sup>14</sup>, Elizabeth Head<sup>15</sup>, and Stanley B. Prusiner<sup>1,2,16\*</sup>

Carlo Condello and Stanley B. Prusiner  
Email: carlo.condello@ucsf.edu and stanley.prusiner@ucsf.edu

### **This PDF file includes:**

- Figure S1
- Figure S2
- Figure S3
- Figure S4
- Figure S5
- Figure S6
- Table S1
- Table S2
- SI References

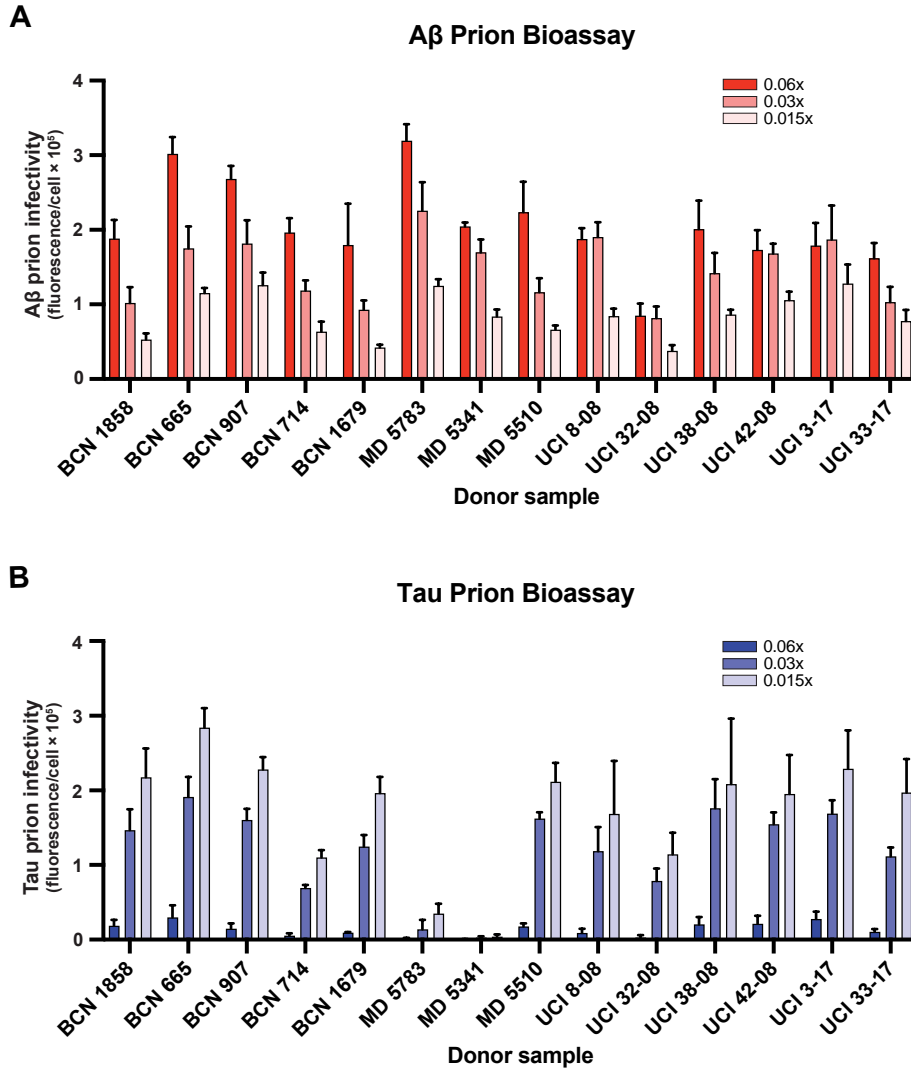

**Fig. S1.** Titration of human Down syndrome and Alzheimer's disease brain extracts in cell-based bioassays. (A, B) PTA extracts from Down syndrome (DS) and sporadic Alzheimer's disease (sAD) brain samples were diluted 0.06x, 0.03x, and 0.015x and mixed with lipofectamine prior to infection of HEK293T cells expressing YFP-A $\beta$ 42 or tauK18(S)-YFP to measure (A) A $\beta$  and (B) tau prion infectivity, respectively. Data presented as the mean and standard deviation of four technical replicates per sample.

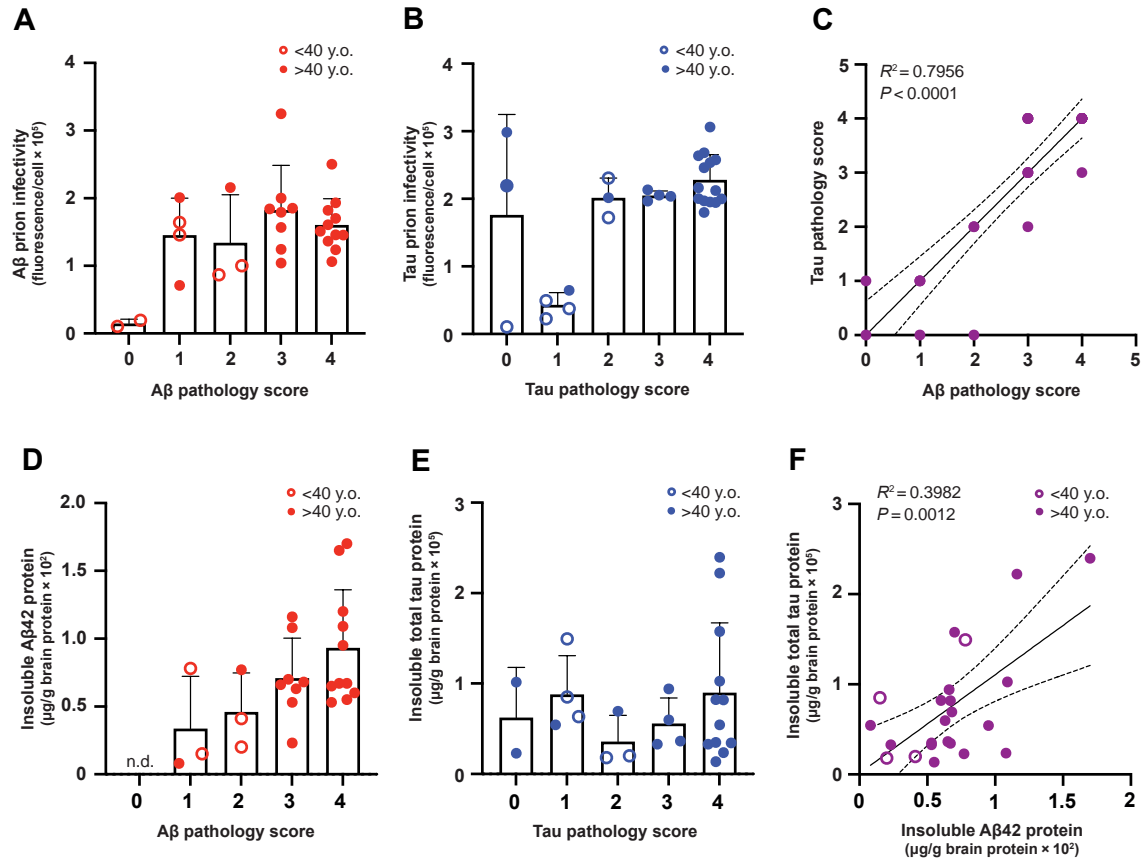

**Fig. S2.** DS prion abundance corresponds to neuropathological scores of plaques and tangles and immunoassays of insoluble Aβ and tau. We used custom neuropathological scores of Aβ and tau neurofibrillary tangle (NFT) burden measured in immunohistochemically stained formalin-fixed frontal cortex sections from the cohort of donors with DS that was previously reported in Maxwell et. al. (1). For additional details, see Methods. The majority of DS samples had Aβ and tau scores ≥3, corresponding to the presence of many cored and neuritic plaques and NFTs. (A) Aβ prion infectivity binned by Aβ plaque pathology score. (B) Tau prion infectivity binned by tau NFT pathology score. (C) Tau pathology score plotted as a function of Aβ pathology score, and a linear regression was performed. (D) Insoluble Aβ42 abundance binned by Aβ plaque pathology score. (E) Insoluble total tau abundance binned by tau NFT pathology score. (F) Insoluble total tau abundance plotted as a function of insoluble Aβ42 abundance, and a linear regression was performed.

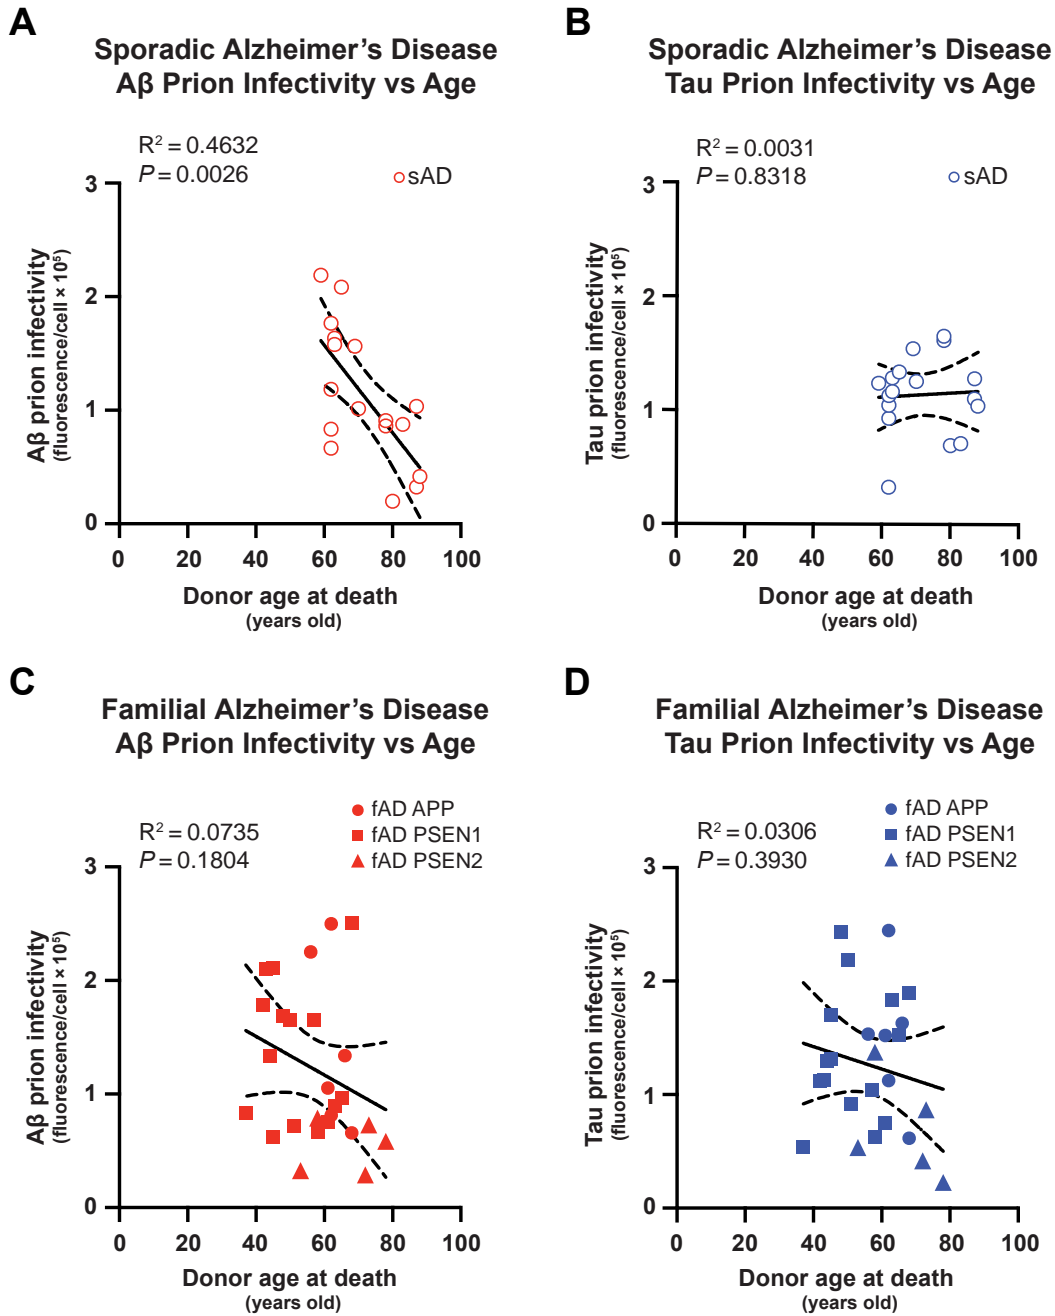

**Fig. S3.** Relationship of donor age at death and prion abundance in sporadic and familial AD. (A, B) Aβ and tau prion infectivity in sAD brain samples plotted as a function of donor age at death. (C, D) Aβ and tau prion infectivity in familial AD (fAD) APP (filled circles), fAD PSEN1 (filled squares), and fAD PSEN2 (filled triangles) brain samples plotted as a function of donor age at death. Linear regression performed in all panels.

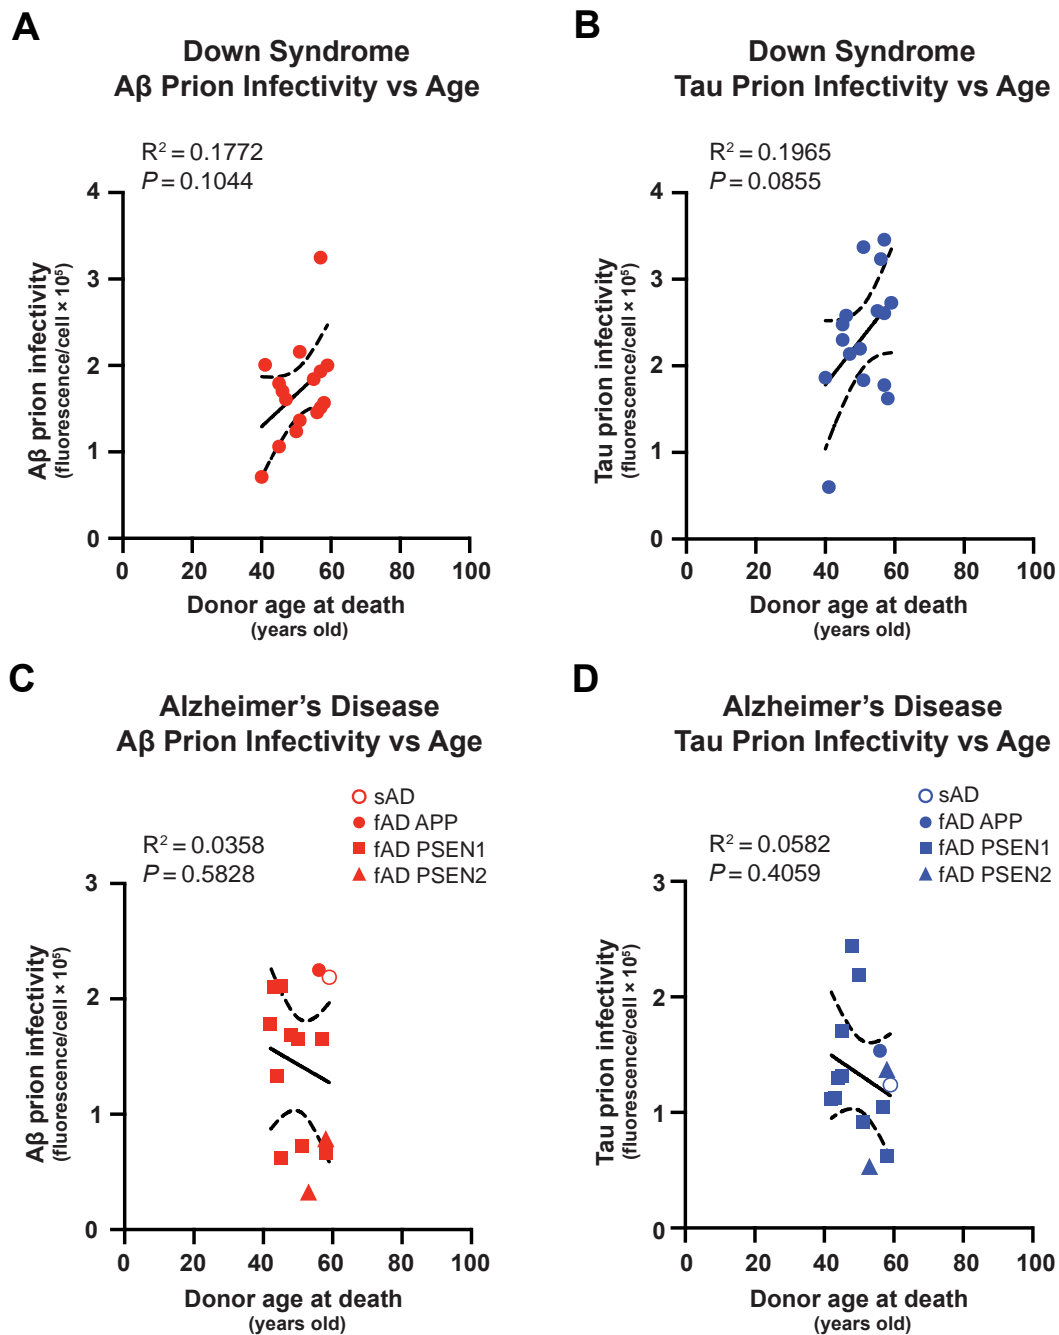

**Fig. S4.** DS and AD prion abundance plotted for cases with an overlapping donor age range of 40 to 60 years old at death. (A, B) Aβ and tau prion infectivity in DS brain samples plotted as a function of donor age at death. (C, D) Aβ and tau prion infectivity in fAD (filled symbols) and sAD (open symbols) brain samples plotted as a function of donor age at death. Linear regression performed in all panels.

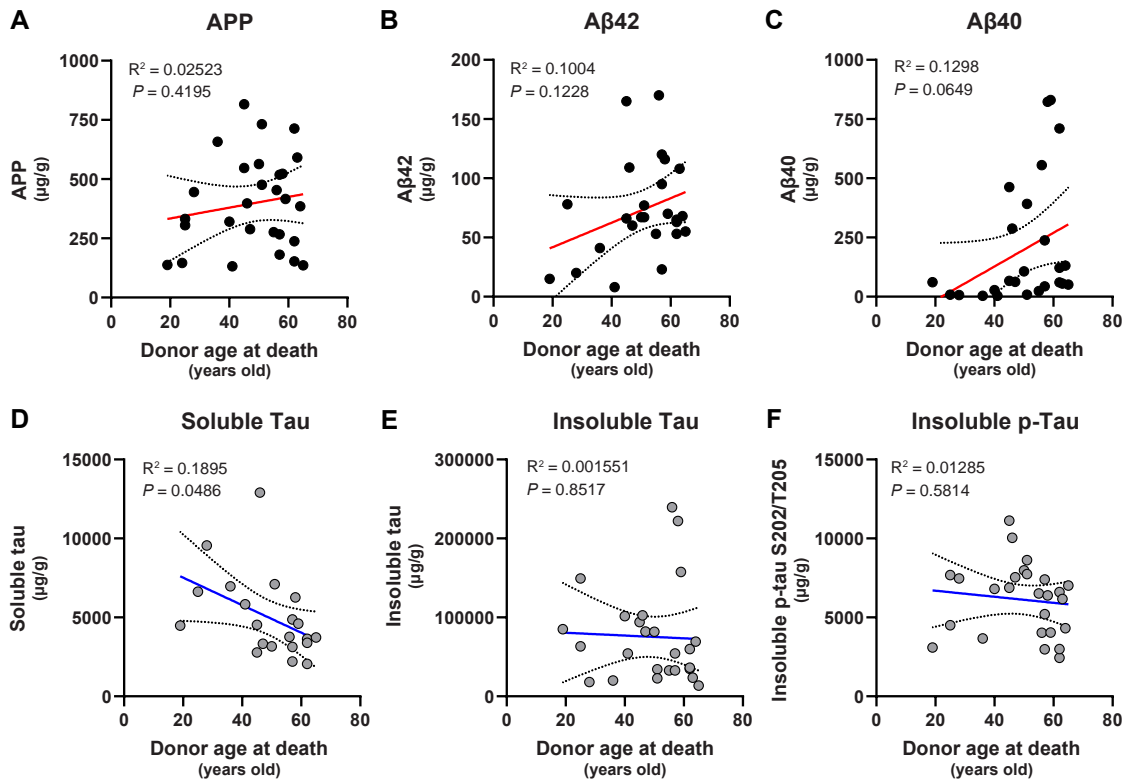

**Fig. S5.** Immunochemical assays of protein abundance in DS brain samples. (A) ELISA measurements of APP protein concentration in soluble brain fractions plotted as a function of donor age at death. (B, C) HTRF measurements of Aβ42 and Aβ40 concentrations in insoluble brain fractions plotted as a function of donor age at death. (D) ELISA measurements of total tau protein concentrations in soluble brain fractions plotted as a function of donor age at death. (E, F) HTRF measurements of total tau and phospho-S202/T205 tau concentrations in insoluble brain fractions plotted as a function of donor age at death. Linear regression performed in all panels.

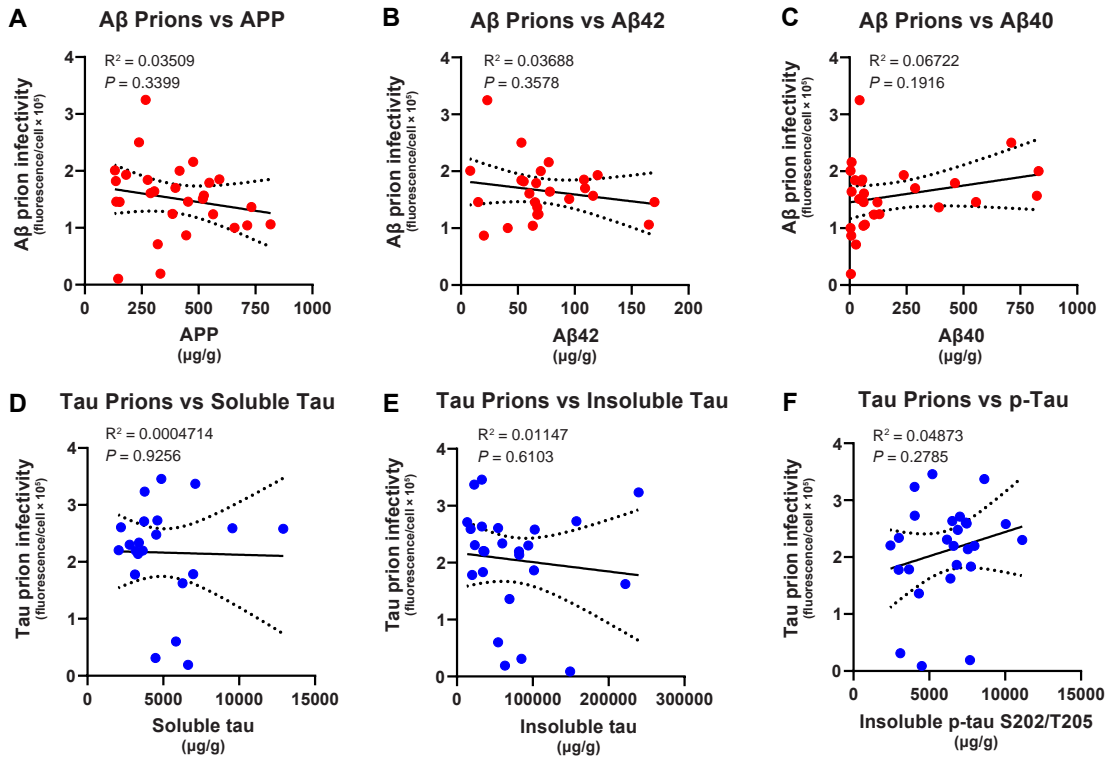

**Fig. S6.** Correlation of prion infectivity levels with protein abundance in DS brain samples. Immunochemical assays of protein abundance in DS brain samples. (A–C) Aβ prion infectivity levels plotted as a function of APP, insoluble Aβ42, or insoluble Aβ40 concentration, respectively. (D–F) Tau prion infectivity levels plotted as a function of soluble total tau, insoluble total tau, or insoluble phospho-S202/T205 tau concentration, respectively. Linear regression performed in all panels.

**Table S1.** Source of postmortem human DS brain tissue samples. Demographic and clinicopathological data for cases with Down syndrome and age-matched controls.

| Cohort | Donor ID# | Age | Sex | NPDx | CERAD Score | Braak Stage | Prion Infectivity        |          | APOE Genotype | Brain Region   | Source                 |
|--------|-----------|-----|-----|------|-------------|-------------|--------------------------|----------|---------------|----------------|------------------------|
|        |           |     |     |      |             |             | Mean (Fluorescence/cell) |          |               |                |                        |
|        |           |     |     |      |             |             | A $\beta$                | Tau      |               |                |                        |
| DS     | Mia18     | 24  | M   | DS   | -           | -           | 10517.4                  | 10387.4  | 3/3           | Frontal cortex | University of Miami    |
| DS     | MD 5341   | 25  | M   | DS   | -           | -           | 164045.7                 | 22432.0  | 3/3           | Frontal cortex | University of Maryland |
| DS     | MD 4870   | 51  | F   | DS   | -           | -           | 136564.9                 | 179783.6 | 2/3           | Frontal cortex | University of Maryland |
| DS     | MD 4904   | 40  | M   | DS   | -           | -           | 71043.9                  | 219329.7 | 3/3           | Frontal cortex | University of Maryland |
| DS     | MD 5713   | 25  | M   | DS   | -           | -           | 19365.5                  | 37428.2  | 2/3           | Frontal cortex | University of Maryland |
| DS     | MD 5600   | 57  | F   | DS   | -           | -           | 324715.3                 | 306222.9 | 3/3           | Frontal cortex | University of Maryland |
| DS     | MD 5386   | 64  | M   | DS   | -           | -           | 124471.0                 | 201766.5 | 3/4           | Frontal cortex | University of Maryland |
| DS     | MD 5277   | 19  | M   | DS   | -           | -           | 145977.3                 | 49129.4  | 3/4           | Frontal cortex | University of Maryland |
| DS     | MD 6151   | 57  | M   | DS   | -           | VI          | 193228.4                 | 216381.0 | 3/3           | Frontal cortex | University of Maryland |
| DS     | MD 4530   | 47  | F   | DS   | -           | -           | 160955.4                 | 196871.0 | 3/4           | Frontal cortex | University of Maryland |



| Cohort | Donor ID# | Age | Sex | NPDx | CERAD Score | Braak Stage | Prion Infectivity        |          | APOE Genotype | Brain Region   | Source                           |
|--------|-----------|-----|-----|------|-------------|-------------|--------------------------|----------|---------------|----------------|----------------------------------|
|        |           |     |     |      |             |             | Mean (Fluorescence/cell) |          |               |                |                                  |
|        |           |     |     |      |             |             | A $\beta$                | Tau      |               |                |                                  |
| DS     | MD 4785   | 55  | F   | DS   | -           | -           | 184294.0                 | 205480.1 | 3/3           | Frontal cortex | University of Maryland           |
| DS     | MD 4335   | 28  | M   | DS   | -           | IV          | 86964.3                  | 230664.2 | 4/4           | Frontal cortex | University of Maryland           |
| DS     | MD 4659   | 46  | F   | DS   | -           | -           | 170006.7                 | 257720.8 | 3/4           | Frontal cortex | University of Maryland           |
| DS     | MD 5783   | 41  | M   | DS   | -           | VI          | 200947.7                 | 64518.4  | 3/4           | Frontal cortex | University of Maryland           |
| DS     | BCN 665   | 59  | F   | DS   | C2          | VI          | 200267.9                 | 246127.9 | 3/4           | Frontal cortex | IDIBAPS (Barcelona)              |
| DS     | BCN 714   | 36  | F   | DS   | C2          | II          | 100221.7                 | 172328.8 | 3/3           | Frontal cortex | IDIBAPS (Barcelona)              |
| DS     | BCN 907   | 63  | M   | DS   | C3          | VI          | 185071.2                 | 253341.2 | 3/3           | Frontal cortex | IDIBAPS (Barcelona)              |
| DS     | BCN 1335  | 62  | F   | DS   | C3          | VI          | 250195.6                 | 212427.8 | 3/4           | Frontal cortex | IDIBAPS (Barcelona)              |
| DS     | BCN 1469  | 62  | M   | DS   | C3          | VI          | 145553.5                 | 203759.2 | 3/4           | Frontal cortex | IDIBAPS (Barcelona)              |
| DS     | UCI 30-05 | 57  | F   | DS   | C3          | VI          | 151304.4                 | 263981.9 | 3/3           | Frontal cortex | University of California, Irvine |
| DS     | UCI 10-13 | 56  | M   | DS   | C3          | VI          | 145692.1                 | 268189.9 | 4/4           | Frontal cortex | University of California, Irvine |
| DS     | UCI 39-17 | 58  | M   | DS   | C3          | VI          | 156991.0                 | 195424.7 | 3/4           | Frontal cortex | University of California, Irvine |

| Cohort  | Donor ID# | Age | Sex | NPDX | CERAD Score | Braak Stage | Prion Infectivity        |          | APOE Genotype | Brain Region   | Source                                               |
|---------|-----------|-----|-----|------|-------------|-------------|--------------------------|----------|---------------|----------------|------------------------------------------------------|
|         |           |     |     |      |             |             | Mean (Fluorescence/cell) |          |               |                |                                                      |
|         |           |     |     |      |             |             | A $\beta$                | Tau      |               |                |                                                      |
| DS      | UCI 31-10 | 62  | F   | DS   | C3          | VI          | 104181.0                 | 213442.8 | 3/3           | Frontal cortex | University of California, Irvine                     |
| DS      | UCI 29-06 | 45  | F   | DS   | C3          | VI          | 106270.2                 | 194510.4 | 3/3           | Frontal cortex | University of California, Irvine                     |
| DS      | UCI 5-15  | 51  | F   | DS   | C3          | III         | 215680.4                 | 298710.1 | 3/3           | Frontal cortex | University of California, Irvine                     |
| DS      | UCI 1-11  | 45  | F   | DS   | C3          | VI          | 179305.3                 | 196788.5 | 3/3           | Frontal cortex | University of California, Irvine                     |
| DS      | UCI 21-14 | 50  | M   | DS   | C3          | VI          | 123793.0                 | 199903.9 | 2/3           | Frontal cortex | University of California, Irvine                     |
| DS      | MD 5510   | 65  | M   | DS   | -           | -           | 182136.2                 | 200480.6 | 3/3           | Frontal cortex | University of Maryland                               |
| Control | RB 18-01  | 35  | M   | NCI  | -           | -           | 5203.3                   | 885.2    | -             | Frontal cortex | Uniformed Services University of the Health Sciences |
| Control | RB 18-16  | 42  | M   | NCI  | -           | -           | 3009.0                   | 6998.3   | -             | Frontal cortex | Uniformed Services University of the Health Sciences |
| Control | RB 19-12  | 66  | M   | NCI  | -           | -           | 2983.0                   | 9240.5   | -             | Frontal cortex | Uniformed Services University of the Health Sciences |
| Control | RB 16-23  | 58  | M   | NCI  | -           | -           | 11765.1                  | 371.9    | -             | Frontal cortex | Uniformed Services University of the Health Sciences |

| Cohort  | Donor ID# | Age | Sex | NPDX | CERAD Score | Braak Stage | Prion Infectivity        |         | APOE Genotype | Brain Region   | Source                                               |
|---------|-----------|-----|-----|------|-------------|-------------|--------------------------|---------|---------------|----------------|------------------------------------------------------|
|         |           |     |     |      |             |             | Mean (Fluorescence/cell) |         |               |                |                                                      |
|         |           |     |     |      |             |             | A $\beta$                | Tau     |               |                |                                                      |
| Control | RB 16-22  | 51  | M   | NCI  | -           | -           | 630.6                    | 1948.2  | -             | Frontal cortex | Uniformed Services University of the Health Sciences |
| Control | RB 16-19  | 41  | M   | NCI  | -           | -           | 3176.2                   | 1341.8  | -             | Frontal cortex | Uniformed Services University of the Health Sciences |
| Control | RB 18-29  | 70  | M   | NCI  | -           | -           | 24610.9                  | 22953.2 | -             | Frontal cortex | Uniformed Services University of the Health Sciences |
| Control | RB 16-16  | 52  | M   | NCI  | -           | -           | 7015.7                   | 876.1   | -             | Frontal cortex | Uniformed Services University of the Health Sciences |
| Control | RB 18-06  | 27  | M   | NCI  | -           | -           | 1646.5                   | 1950.8  | -             | Frontal cortex | Uniformed Services University of the Health Sciences |
| Control | RB 18-15  | 67  | M   | NCI  | -           | -           | 5074.6                   | 745.7   | -             | Frontal cortex | Uniformed Services University of the Health Sciences |
| Control | RB 18-09  | 62  | M   | NCI  | -           | -           | 12924.9                  | 3835.2  | -             | Frontal cortex | Uniformed Services University of the Health Sciences |
| Control | RB 18-25  | 44  | M   | NCI  | -           | -           | 6636.0                   | 8354.2  | -             | Frontal cortex | Uniformed Services University of the Health Sciences |

| Cohort  | Donor ID# | Age | Sex | NPDX | CERAD Score | Braak Stage | Prion Infectivity        |        | APOE Genotype | Brain Region   | Source                                               |
|---------|-----------|-----|-----|------|-------------|-------------|--------------------------|--------|---------------|----------------|------------------------------------------------------|
|         |           |     |     |      |             |             | Mean (Fluorescence/cell) |        |               |                |                                                      |
|         |           |     |     |      |             |             | A $\beta$                | Tau    |               |                |                                                      |
| Control | RB 19-13  | 35  | M   | NCI  | -           | -           | 5782.0                   | 1388.7 | -             | Frontal cortex | Uniformed Services University of the Health Sciences |
| Control | RB 18-14  | 37  | M   | NCI  | -           | -           | 5936.0                   | 797.5  | -             | Frontal cortex | Uniformed Services University of the Health Sciences |

Abbreviations: DS, Down syndrome; NCI, no cognitive impairment; NPDX, neuropathological diagnosis; PMI, postmortem interval; CERAD, Consortium to Establish a Registry for Alzheimer's Disease; APOE, apolipoprotein E.

**Table S2.** Source of postmortem human AD brain tissue samples. Demographic and clinicopathological data for cases with familial and sporadic Alzheimer's disease and age-matched controls.

| Cohort | Donor ID# | Sex | Age | NPDX        | Mutation | CERAD Score | Braak Stage | Prion Infectivity        |          | APOE Genotype | Brain Region    | Source                        |
|--------|-----------|-----|-----|-------------|----------|-------------|-------------|--------------------------|----------|---------------|-----------------|-------------------------------|
|        |           |     |     |             |          |             |             | Mean (Fluorescence/cell) |          |               |                 |                               |
|        |           |     |     |             |          |             |             | A $\beta$                | Tau      |               |                 |                               |
| sAD    | P1952     | F   | 82  | AD          | -        | C3          | V-VI        | 87574.9                  | 71119.5  | -             | Frontal cortex  | UCSF NDBB                     |
| sAD    | P2217     | M   | 63  | AD          | -        | C3          | VI          | 163400.0                 | 128582.0 | 3/4           | Temporal cortex | UCSF NDBB                     |
| sAD    | P2273     | M   | 63  | AD          | -        | C3          | VI          | 157781.0                 | 116578.0 | 3/3           | Temporal cortex | UCSF NDBB                     |
| sAD    | P2287     | F   | 69  | AD          | -        | C3          | VI          | 156471.0                 | 154386.0 | 3/3           | Temporal cortex | UCSF NDBB                     |
| sAD    | P2312.10  | M   | 59  | AD          | -        | C3          | VI          | 218990.0                 | 123934.0 | 4/4           | Temporal cortex | UCSF NDBB                     |
| sAD    | P2330.11  | M   | 70  | AD          | -        | C3          | VI          | 101308.0                 | 125670.0 | 3/4           | Temporal cortex | UCSF NDBB                     |
| sAD    | P2350.11  | F   | 65  | AD          | -        | C3          | VI          | 208337.0                 | 133892.0 | 2/3           | Temporal cortex | UCSF NDBB                     |
| sAD    | BBN_6072  | M   | 78  | AD,CAA, SVD | -        | C2          | III         | 90763.8                  | 161592.0 | 3/4           | Temporal cortex | University of Manchester (UK) |
| sAD    | BBN_3416  | M   | 87  | AD,CAA, SVD | -        | C2          | IV          | 103453.0                 | 110250.0 | 3/4           | Temporal cortex | University of Manchester (UK) |

| Cohort  | Donor ID# | Sex | Age | NPDX    | Mutation        | CERAD Score | Braak Stage | Prion Infectivity        |          | APOE Genotype | Brain Region     | Source                             |
|---------|-----------|-----|-----|---------|-----------------|-------------|-------------|--------------------------|----------|---------------|------------------|------------------------------------|
|         |           |     |     |         |                 |             |             | Mean (Fluorescence/cell) |          |               |                  |                                    |
|         |           |     |     |         |                 |             |             | A $\beta$                | Tau      |               |                  |                                    |
| sAD     | BBN_15592 | M   | 62  | AD,LBD  | -               | C3          | -           | 176745.0                 | 93067.6  | 3/4           | Temporal cortex  | University of Manchester (UK)      |
| sAD     | #10       | F   | 85  | AD      | -               | C2          | V-VI        | 83436.2                  | 32677.4  | -             | Temporal cortex  | Uppsala University (Sweden)        |
| sAD     | 12-1181   | M   | 62  | AD      | -               | C3          | VI          | 66640.2                  | 104679.7 | -             | Frontal cortex   | University of Washington (Seattle) |
| sAD     | 07-0997   | F   | 87  | AD      | -               | C3          | VI          | 32384.1                  | 128180.3 | 3/3           | Occipital Cortex | University of Washington (Seattle) |
| sAD     | 2412.12   | M   | 88  | AD      | -               | C3          | VI          | 41659.2                  | 104035.4 | 3/4           | Parietal cortex  | UCSF NDBB                          |
| sAD     | 2376.11   | M   | 80  | AD      | -               | C3          | VI          | 19901.9                  | 69475.6  | 3/3           | Parietal cortex  | UCSF NDBB                          |
| sAD     | P1959     | M   | 61  | AD      | -               | C3          | V-VI        | 118498                   | 113219.9 | -             | Frontal cortex   | UCSF NDBB                          |
| sAD     | P2478     | M   | 78  | AD      | -               | C3          | V           | 86123.6                  | 165391.9 | -             | Temporal cortex  | UCSF NDBB                          |
| fAD APP | #2        | F   | 61  | AD, CAA | KM670/671NL APP | C3          | V-VI        | 105313.0                 | 152202.0 | 3/4           | Temporal cortex  | Uppsala University (Sweden)        |

| Cohort   | Donor ID# | Sex | Age | NPDX | Mutation         | CERAD Score | Braak Stage | Prion Infectivity        |          | APOE Genotype | Brain Region    | Source                         |
|----------|-----------|-----|-----|------|------------------|-------------|-------------|--------------------------|----------|---------------|-----------------|--------------------------------|
|          |           |     |     |      |                  |             |             | Mean (Fluorescence/cell) |          |               |                 |                                |
|          |           |     |     |      |                  |             |             | A $\beta$                | Tau      |               |                 |                                |
| fAD APP  | 6901      | M   | 62  | AD   | KM670/671NL APP  | C3          | VI          | 249857.0                 | 244544.0 | 3/3           | Frontal cortex  | Karolinska Institutet (Sweden) |
| fAD APP  | 493       | M   | 68  | AD   | KM670/671NL APP  | C3          | -           | 65952.0                  | 61586.0  | 2/3           | Parietal cortex | Karolinska Institutet (Sweden) |
| fAD APP  | 39794     | M   | 66  | AD   | KM670/671NL APP  | C3          | VI          | 133822.0                 | 162773.0 | 2/3           | Frontal cortex  | Karolinska Institutet (Sweden) |
| fAD APP  | 7795      | M   | 56  | AD   | KM670/671NL APP  | C3          | VI          | 225026.0                 | 153367.0 | 4/4           | Frontal cortex  | Karolinska Institutet (Sweden) |
| fAD APP  | 14096     | F   | 62  | AD   | KM670/671NL APP  | C3          | VI          | 81449.5                  | 112489.0 | 3/3           | Frontal cortex  | Karolinska Institutet (Sweden) |
| fAD PSEN | BBN_13829 | M   | 42  | AD   | $\Delta$ 4 PSEN1 | C3          | VI          | 178324.0                 | 111941.0 | 3/3           | Temporal cortex | King's College London (UK)     |

| Cohort   | Donor ID# | Sex | Age | NPDX | Mutation    | CERAD Score | Braak Stage | Prion Infectivity        |          | APOE Genotype | Brain Region    | Source                             |
|----------|-----------|-----|-----|------|-------------|-------------|-------------|--------------------------|----------|---------------|-----------------|------------------------------------|
|          |           |     |     |      |             |             |             | Mean (Fluorescence/cell) |          |               |                 |                                    |
|          |           |     |     |      |             |             |             | A $\beta$                | Tau      |               |                 |                                    |
| fAD PSEN | BBN_3246  | F   | 57  | AD   | M139V PSEN1 | C3          | VI          | 165718.0                 | 104424.0 | 3/3           | Temporal cortex | University of Manchester (UK)      |
| fAD PSEN | 3206      | M   | 45  | AD   | I143T PSEN1 | C3          | VI          | 211418.0                 | 170413.0 | 3/3           | Frontal cortex  | Karolinska Institutet (Sweden)     |
| fAD PSEN | 12908     | F   | 43  | AD   | I143T PSEN1 | C3          | VI          | 210281.0                 | 112727.0 | 3/4           | Frontal cortex  | Karolinska Institutet (Sweden)     |
| fAD PSEN | 00-0700   | M   | 37  | AD   | I143T PSEN1 | C3          | VI          | 83235.2                  | 53602.2  | 3/3           | Frontal cortex  | University of Washington (Seattle) |
| fAD PSEN | 4602      | F   | 50  | AD   | I143T PSEN1 | C3          | VI          | 165621.0                 | 218704.0 | 3/4           | Frontal cortex  | Karolinska Institutet (Sweden)     |



| Cohort   | Donor ID# | Sex | Age | NPDx | Mutation    | CERAD Score | Braak Stage | Prion Infectivity        |          | APOE Genotype | Brain Region   | Source                             |
|----------|-----------|-----|-----|------|-------------|-------------|-------------|--------------------------|----------|---------------|----------------|------------------------------------|
|          |           |     |     |      |             |             |             | Mean (Fluorescence/cell) |          |               |                |                                    |
|          |           |     |     |      |             |             |             | A $\beta$                | Tau      |               |                |                                    |
| fAD PSEN | 2598      | F   | 48  | AD   | I143T PSEN1 | C3          | VI          | 168997.0                 | 243669.0 | 3/4           | Frontal cortex | Karolinska Institutet (Sweden)     |
| fAD PSEN | 1104      | M   | 68  | AD   | H163Y PSEN1 | C3          | V-VI        | 250990.0                 | 189349.0 | 3/4           | Frontal cortex | Karolinska Institutet (Sweden)     |
| fAD PSEN | 8715      | M   | 63  | AD   | H163Y PSEN1 | C3          | V-VI        | 89638.3                  | 183206.0 | 2/4           | Frontal cortex | Karolinska Institutet (Sweden)     |
| fAD PSEN | 12829     | M   | 45  | AD   | G209V PSEN1 | C3          | VI          | 62281.3                  | 131365.0 | 3/3           | Frontal cortex | University of Washington (Seattle) |
| fAD PSEN | 25044     | F   | 51  | AD   | G209V PSEN1 | C3          | VI          | 72232.7                  | 91817.4  | 2/3           | Frontal cortex | University of Washington (Seattle) |

| Cohort   | Donor ID# | Sex | Age | NPDX | Mutation    | CERAD Score | Braak Stage | Prion Infectivity        |          | APOE Genotype | Brain Region    | Source                             |
|----------|-----------|-----|-----|------|-------------|-------------|-------------|--------------------------|----------|---------------|-----------------|------------------------------------|
|          |           |     |     |      |             |             |             | Mean (Fluorescence/cell) |          |               |                 |                                    |
|          |           |     |     |      |             |             |             | A $\beta$                | Tau      |               |                 |                                    |
| fAD PSEN | 01-0164   | M   | 58  | AD   | G209V PSEN1 | C3          | V           | 66485.9                  | 62452.8  | 2/3           | Frontal cortex  | University of Washington (Seattle) |
| fAD PSEN | 02-0621   | F   | 44  | AD   | A260V PSEN1 | C3          | VI          | 133364.0                 | 129629.0 | 3/3           | Frontal cortex  | University of Washington (Seattle) |
| fAD PSEN | BBN_13813 | F   | 65  | AD   | E280G PSEN1 | C3          | VI          | 96323.7                  | 152366.0 | 3/4           | Temporal cortex | King's College London (UK)         |
| fAD PSEN | 00-0281   | M   | 61  | AD   | A431E PSEN1 | C3          | VI          | 75891.9                  | 74949.8  | 3/3           | Frontal cortex  | University of Washington (Seattle) |
| fAD PSEN | 12540     | M   | 72  | AD   | N141I PSEN2 | C3          | VI          | 28987.9                  | 41728.4  | 3/4           | Frontal cortex  | University of Washington (Seattle) |

| Cohort   | Donor ID#    | Sex | Age | NPDX | Mutation    | CERAD Score | Braak Stage | Prion Infectivity        |          | APOE Genotype | Brain Region   | Source                             |
|----------|--------------|-----|-----|------|-------------|-------------|-------------|--------------------------|----------|---------------|----------------|------------------------------------|
|          |              |     |     |      |             |             |             | Mean (Fluorescence/cell) |          |               |                |                                    |
|          |              |     |     |      |             |             |             | A $\beta$                | Tau      |               |                |                                    |
| fAD PSEN | 23156        | F   | 78  | AD   | N141I PSEN2 | C3          | V           | 58334.4                  | 22640.7  | 2/3           | Frontal cortex | University of Washington (Seattle) |
| fAD PSEN | 26111        | F   | 53  | AD   | N141I PSEN2 | C3          | V           | 32669.1                  | 53298.1  | 3/4           | Frontal cortex | University of Washington (Seattle) |
| fAD PSEN | 11-0929      | M   | 58  | AD   | N141I PSEN2 | C3          | VI          | 78907.4                  | 137379.0 | 3/3           | Frontal cortex | University of Washington (Seattle) |
| fAD PSEN | 12-0370      | M   | 73  | AD   | N141I PSEN2 | C3          | VI          | 72891.8                  | 86654.1  | -             | Frontal cortex | University of Washington (Seattle) |
| Control  | HCTMI_15_001 | M   | 62  | NCI  | -           | -           | -           | 10823.7                  | 8710.97  | -             | Putamen        | University of Miami                |
| Control  | HCTQJ_15_002 | F   | 67  | NCI  | -           | -           | -           | 11257.7                  | 2463.3   | -             | Putamen        | University of Miami                |

| Cohort  | Donor ID#    | Sex | Age | NPDX | Mutation | CERAD Score | Braak Stage | Prion Infectivity        |         | APOE Genotype | Brain Region    | Source                    |
|---------|--------------|-----|-----|------|----------|-------------|-------------|--------------------------|---------|---------------|-----------------|---------------------------|
|         |              |     |     |      |          |             |             | Mean (Fluorescence/cell) |         |               |                 |                           |
|         |              |     |     |      |          |             |             | A $\beta$                | Tau     |               |                 |                           |
| Control | HCTNU_15_008 | M   | 59  | NCI  | -        | -           | -           | 9712.2                   | 8442.7  | -             | Putamen         | University of Miami       |
| Control | HCTLT_15_009 | M   | 65  | NCI  | -        | -           | -           | 7980.0                   | 3918.0  | -             | Putamen         | University of Miami       |
| Control | P78/06       | F   | 68  | NCI  | -        | -           | -           | 6240.9                   | 8486.5  | -             | Frontal cortex  | University College London |
| Control | PDC023       | -   | -   | NCI  | -        | -           | -           | 3563.0                   | 3058.6  | -             | Frontal cortex  | UKPD Brain Bank           |
| Control | P2207        | F   | 81  | NCI  | -        | C0          | II          | 2431.8                   | 8625.9  | 3/3           | Temporal cortex | UCSF NDBB                 |
| Control | P2594        | F   | 86  | NCI  | -        | C0          | II          | 8993.2                   | 12192.8 | -             | Temporal cortex | UCSF NDBB                 |
| Control | #23          | F   | 88  | NCI  | -        | C0          | II          | 9175.8                   | 20084.3 | -             | Frontal cortex  | Uppsala University        |
| Control | #24          | M   | 63  | NCI  | -        | C0          | 0           | 4208.7                   | 16558.6 | -             | Frontal cortex  | Uppsala University        |

Abbreviations: sAD, sporadic AD; fAD, familial AD; CAA, cerebral amyloid angiopathy; SVD, small vessel disease; LBD, Lewy body dementia; APP, amyloid precursor protein; PSEN, presenilin; NCI, no cognitive impairment; NPDX, neuropathological diagnosis; CERAD, Consortium to Establish a Registry for Alzheimer's Disease; APOE, apolipoprotein E; UCSF NDBB, UCSF Neurodegenerative Disease Brain Bank.

## SI References

1. A. M. Maxwell *et al.*, Emergence of distinct and heterogeneous strains of amyloid beta with advanced Alzheimer's disease pathology in Down syndrome. *Acta Neuropathol Commun* **9**, 201 (2021).
